# Supplementary material for: Effects of Fertilization and Sampling Time on Composition and Diversity of Entire and Active Bacterial Communities in German Grassland Soils
Source: PubMed Central journal article supplement (PMC4687936; doi:10.1371/journal.pone.0145575), 2015-12-22
Supplement: pone.0145575.s002.pdf [file pone.0145575.s002.pdf]

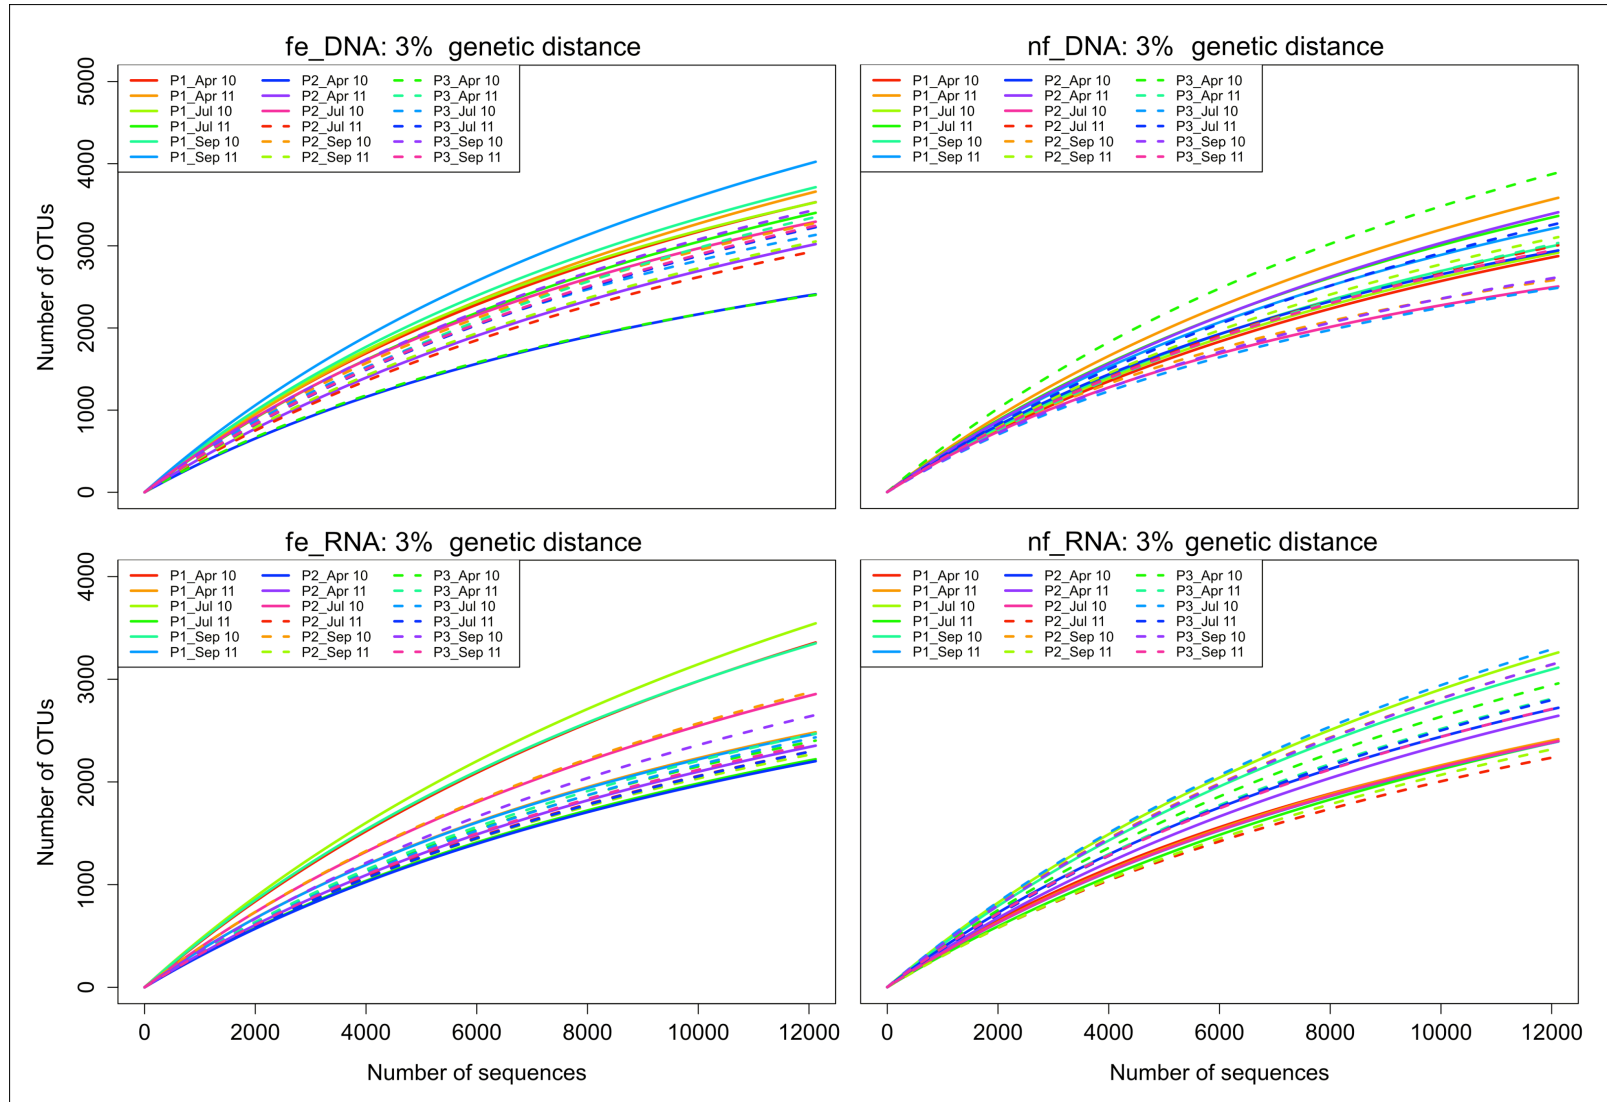

**Figure S2.** Rarefaction curves at 3% genetic distance calculated for the entire bacterial community in fertilized plots (fe\_DNA:3%), active bacterial community in fertilized plots (fe\_RNA:3%), entire bacterial community in non-fertilized plots (nf\_DNA:3%), and active bacterial community in non-fertilized plots (nf\_RNA:3%).
