# Supplementary material for: Effects of Fertilization and Sampling Time on Composition and Diversity of Entire and Active Bacterial Communities in German Grassland Soils
Source: PubMed Central journal article supplement (PMC4687936; doi:10.1371/journal.pone.0145575), 2015-12-22
Supplement: pone.0145575.s004.pdf [file pone.0145575.s004.pdf]

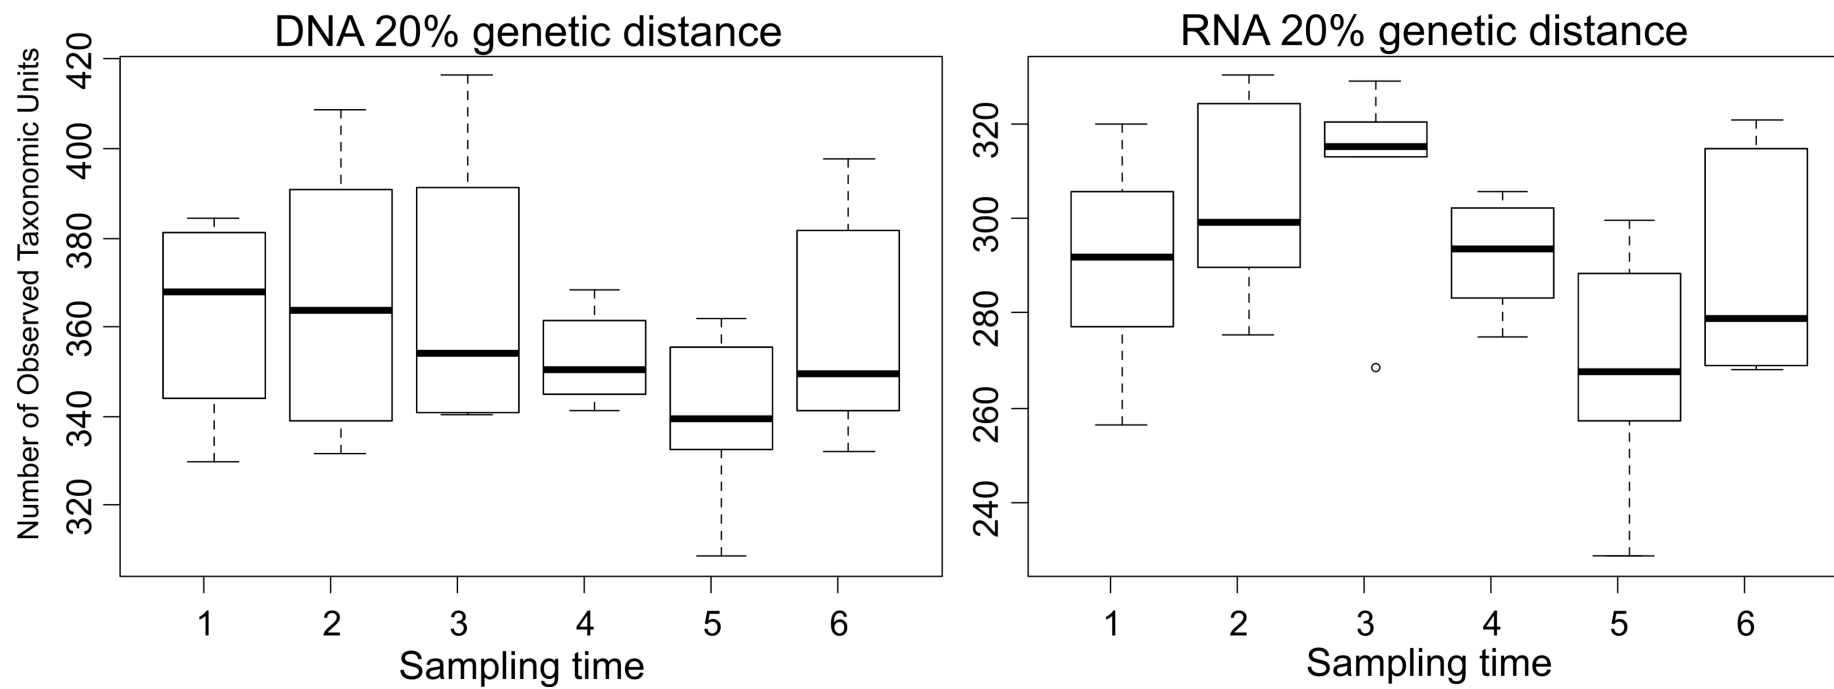

**Figure S4. Boxplot diagram of the number of taxonomic units (OTUs) at 20% genetic distance over sampling time at DNA and RNA level. 1; April 2010, 2; July 2010, 3; September 2010, 4; April 2011, 5; July 2011, and 6; September 2011.**
