# Supplementary material for: Effects of Fertilization and Sampling Time on Composition and Diversity of Entire and Active Bacterial Communities in German Grassland Soils
Source: PubMed Central journal article supplement (PMC4687936; doi:10.1371/journal.pone.0145575), 2015-12-22
Supplement: pone.0145575.s005.pdf [file pone.0145575.s005.pdf]

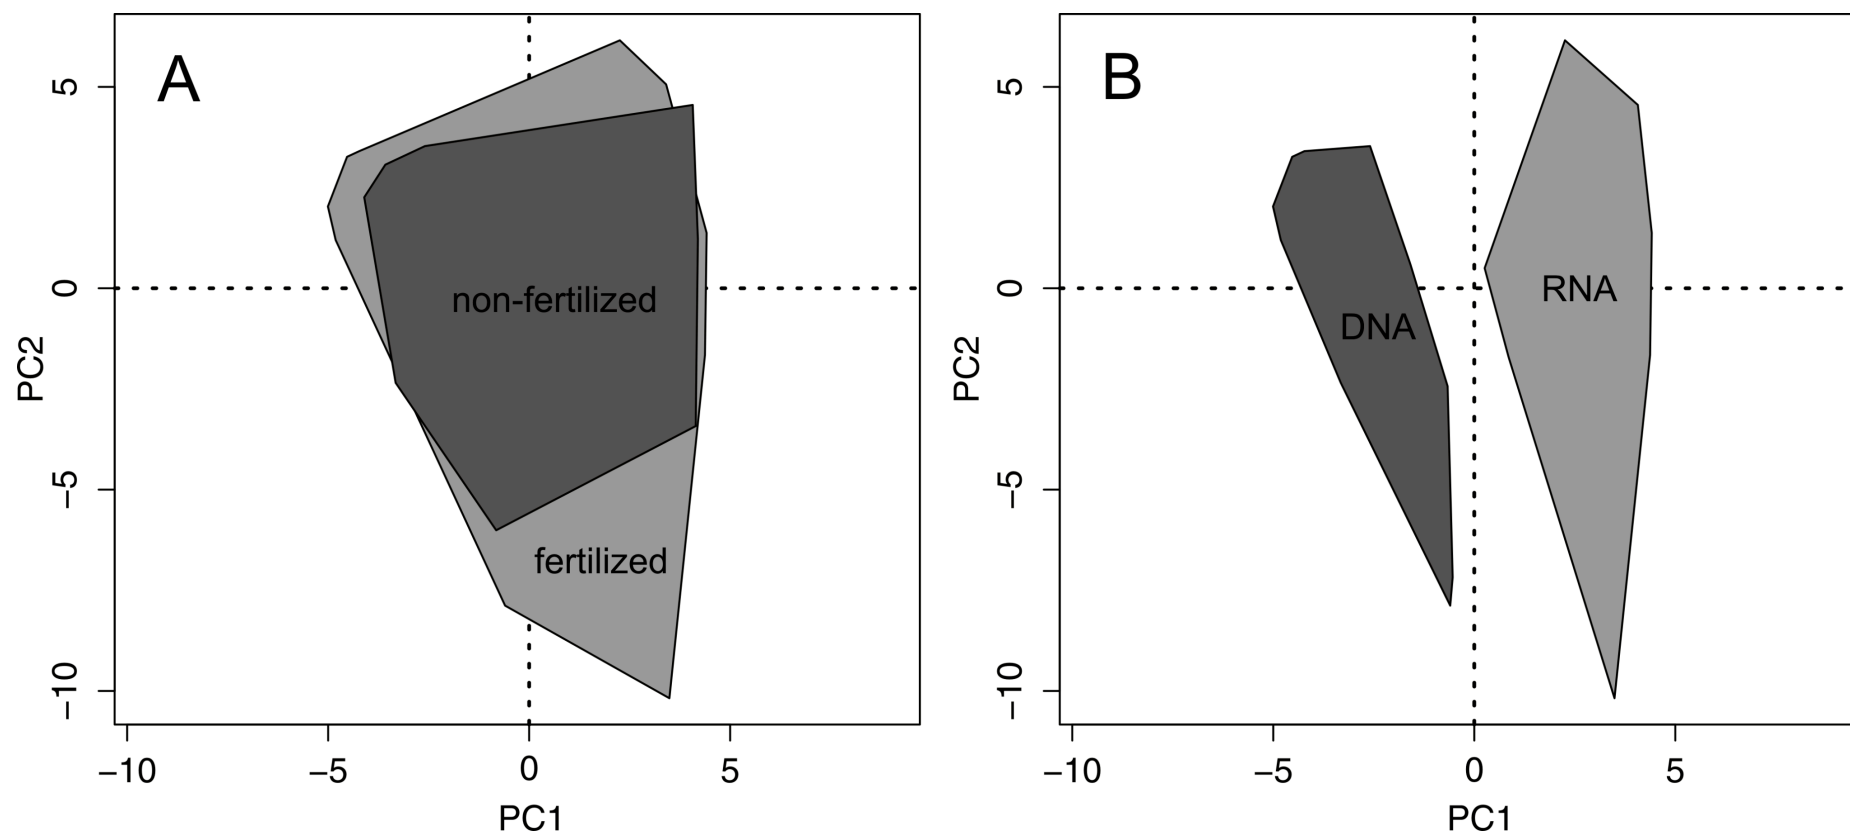

**Figure S5.** Redundancy analysis (RDA) of the functional bacterial community profiles derived from fertilizer and non-fertilizer treatments (A), and entire and active bacterial communities (B).
