# Supplementary material for: Effects of Fertilization and Sampling Time on Composition and Diversity of Entire and Active Bacterial Communities in German Grassland Soils
Source: PubMed Central journal article supplement (PMC4687936; doi:10.1371/journal.pone.0145575), 2015-12-22
Supplement: pone.0145575.s006.pdf [file pone.0145575.s006.pdf]

**Table S1.** Climatic conditions in 2010 and 2011 at the sampling site. Sampling times in 2010 and 2011 are indicated by bold letters.

| Month            | Mean temperature (°C) |              | Mean precipitation (mm) |               |
|------------------|-----------------------|--------------|-------------------------|---------------|
|                  | 2010                  | 2011         | 2010                    | 2011          |
| January          | -4.72                 | 0.15         | n.d.                    | 19.4          |
| February         | -2.62                 | 0.05         | n.d.                    | 35.5          |
| March            | 1.93                  | 4.42         | 53.13                   | 6             |
| <b>April</b>     | <b>7.78</b>           | <b>11.26</b> | <b>14.84</b>            | <b>41.75</b>  |
| May              | 8.45                  | 12.71        | 113.39                  | 23.25         |
| June             | 15.65                 | 15.17        | 26.45                   | 60.5          |
| <b>July</b>      | <b>19.87</b>          | <b>14.48</b> | <b>47.27</b>            | <b>110.85</b> |
| August           | 15.36                 | 16.62        | 181.70                  | 125.25        |
| <b>September</b> | <b>11.42</b>          | <b>14.75</b> | <b>102.12</b>           | <b>54.75</b>  |
| October          | 7.65                  | 9.24         | 37.835                  | 69.5          |
| November         | 3.24                  | 5.52         | 155.135                 | 15.25         |
| December         | -4.81                 | 2.51         | n.d.                    | 162           |
