# Supplementary material for: Effects of Fertilization and Sampling Time on Composition and Diversity of Entire and Active Bacterial Communities in German Grassland Soils
Source: PubMed Central journal article supplement (PMC4687936; doi:10.1371/journal.pone.0145575), 2015-12-22
Supplement: pone.0145575.s007.pdf [file pone.0145575.s007.pdf]

**Table S2.** Soil properties in fertilized and non-fertilized samples.

| <b>Sample/<br/>plot</b> | <b>Sampling<br/>time</b> | <b>Plot<br/>treatment</b> | <b>pH value<br/>(+KCl) <math>\pm</math> SD</b> | <b>Water content<br/><math>\pm</math> SD (%)</b> | <b>C/N</b> |
|-------------------------|--------------------------|---------------------------|------------------------------------------------|--------------------------------------------------|------------|
| fe1.apr10               | spring 2010              | fertilized                | 4.9 $\pm$ 0.2                                  | 27.8 $\pm$ 2.3                                   | 14.2       |
| fe2.apr10               | spring 2010              | fertilized                | 4.8 $\pm$ 0.1                                  | 27.6 $\pm$ 1.9                                   | 12.3       |
| fe3.apr10               | spring 2010              | fertilized                | 4.2 $\pm$ 0.4                                  | 28.9 $\pm$ 1.4                                   | 13.3       |
| fe1.jul10               | summer2010               | fertilized                | 5.4 $\pm$ 0.6                                  | 16.3 $\pm$ 4.7                                   | 13.5       |
| fe2.jul10               | summer 2010              | fertilized                | 4.6 $\pm$ 0.2                                  | 13.1 $\pm$ 1.2                                   | 12.0       |
| fe3.jul10               | summer 2010              | fertilized                | 4.3 $\pm$ 0.2                                  | 13.4 $\pm$ 1.0                                   | 12.3       |
| fe1.sep10               | autumn 2010              | fertilized                | 4.6 $\pm$ 0.9                                  | 24.9 $\pm$ 0.7                                   | 14.5       |
| fe2.sep10               | autumn 2010              | fertilized                | 4.5 $\pm$ 0.0                                  | 23.9 $\pm$ 1.9                                   | 13.6       |
| fe3.sep10               | autumn 2010              | fertilized                | 4.6 $\pm$ 0.2                                  | 24.9 $\pm$ 0.7                                   | 13.0       |
| nf1.apr10               | spring 2010              | non-fertilized            | 4.8 $\pm$ 0.1                                  | 28.4 $\pm$ 1.5                                   | 13.3       |
| nf2.apr10               | spring 2010              | non-fertilized            | 4.8 $\pm$ 0.2                                  | 28.2 $\pm$ 0.6                                   | 15.2       |
| nf3.apr10               | spring 2010              | non-fertilized            | 4.6 $\pm$ 0.1                                  | 28.1 $\pm$ 0.8                                   | 14.6       |
| nf1.jul10               | summer2010               | non-fertilized            | 4.9 $\pm$ 0.2                                  | 12.6 $\pm$ 1.1                                   | 11.8       |
| nf2.jul10               | summer 2010              | non-fertilized            | 4.5 $\pm$ 0.1                                  | 13.6 $\pm$ 0.5                                   | 11.1       |
| nf3.jul10               | summer 2010              | non-fertilized            | 4.9 $\pm$ 0.2                                  | 13.6 $\pm$ 3.4                                   | 11.9       |
| nf1.sep10               | autumn 2010              | non-fertilized            | 4.7 $\pm$ 0.2                                  | 24.4 $\pm$ 0.8                                   | 13.1       |
| nf2.sep10               | autumn 2010              | non-fertilized            | 4.8 $\pm$ 0.3                                  | 25.1 $\pm$ 2.6                                   | 13.8       |
| nf3.sep10               | autumn 2010              | non-fertilized            | 4.5 $\pm$ 0.1                                  | 23.9 $\pm$ 1.8                                   | 13.1       |
| fe1.apr11               | spring 2011              | fertilized                | 6.2 $\pm$ 1.2                                  | 25.2 $\pm$ 1.1                                   | 13.3       |
| fe2.apr11               | spring 2011              | fertilized                | 4.6 $\pm$ 0.1                                  | 25.6 $\pm$ 1.4                                   | 12.7       |
| fe3.apr11               | spring 2011              | fertilized                | 4.7 $\pm$ 0.1                                  | 24.6 $\pm$ 1.1                                   | 13.7       |
| fe1.jul11               | summer2011               | fertilized                | 4.8 $\pm$ 0.0                                  | 26.5 $\pm$ 0.1                                   | 13.8       |
| fe2.jul11               | summer 2011              | fertilized                | 4.9 $\pm$ 0.0                                  | 25.5 $\pm$ 0.3                                   | 11.7       |
| fe3.jul11               | summer 2011              | fertilized                | 4.5 $\pm$ 0.0                                  | 24.9 $\pm$ 0.4                                   | 13.4       |
| fe1.sep11               | autumn 2011              | fertilized                | 6.1 $\pm$ 1.2                                  | 33.0 $\pm$ 1.1                                   | 14.5       |
| fe2.sep11               | autumn 2011              | fertilized                | 4.4 $\pm$ 0.0                                  | 33.8 $\pm$ 1.6                                   | 12.5       |
| fe3.sep11               | autumn 2011              | fertilized                | 4.5 $\pm$ 0.1                                  | 33.2 $\pm$ 0.7                                   | 12.9       |
| nf1.apr11               | spring 2011              | non-fertilized            | 4.7 $\pm$ 0.2                                  | 23.8 $\pm$ 0.7                                   | 14.1       |
| nf2.apr11               | spring 2011              | non-fertilized            | 4.5 $\pm$ 0.2                                  | 24.7 $\pm$ 0.4                                   | 13.3       |
| nf3.apr11               | spring 2011              | non-fertilized            | 4.3 $\pm$ 0.1                                  | 25.0 $\pm$ 1.1                                   | 13.9       |
| nf1.jul11               | summer2011               | non-fertilized            | 4.7 $\pm$ 0.0                                  | 24.5 $\pm$ 0.6                                   | 12.6       |
| nf2.jul11               | summer 2011              | non-fertilized            | 4.7 $\pm$ 0.0                                  | 23.8 $\pm$ 0.8                                   | 13.4       |
| nf3.jul11               | summer 2011              | non-fertilized            | 4.6 $\pm$ 0.0                                  | 25.5 $\pm$ 0.4                                   | 14.7       |
| nf1.sep11               | autumn 2011              | non-fertilized            | 4.9 $\pm$ 0.2                                  | 31.9 $\pm$ 1.2                                   | 12.7       |
| nf2.sep11               | autumn 2011              | non-fertilized            | 4.8 $\pm$ 0.1                                  | 34.0 $\pm$ 0.8                                   | 11.7       |
| nf3.sep11               | autumn 2011              | non-fertilized            | 4.6 $\pm$ 0.2                                  | 32.7 $\pm$ 2.1                                   | 14.7       |
