# Supplementary material for: Effects of Fertilization and Sampling Time on Composition and Diversity of Entire and Active Bacterial Communities in German Grassland Soils
Source: PubMed Central journal article supplement (PMC4687936; doi:10.1371/journal.pone.0145575), 2015-12-22
Supplement: pone.0145575.s008.pdf [file pone.0145575.s008.pdf]

Table S3. Number of 16S rRNA gene sequences derived from the analyzed soil samples

| <b>Sample/plot</b> | <b>Season</b> | <b>Year</b> | <b>Treatment</b> | <b>Type</b> | <b>No. of sequences <math>\geq</math> 200 bp</b> |
|--------------------|---------------|-------------|------------------|-------------|--------------------------------------------------|
| fe.1.apr10.D       | April         | 2010        | fertilized       | DNA         | 33037                                            |
| fe.2.apr10.D       | April         | 2010        | fertilized       | DNA         | 51918                                            |
| fe.3.apr10.D       | April         | 2010        | fertilized       | DNA         | 63036                                            |
| fe.1.jul10.D       | July          | 2010        | fertilized       | DNA         | 42250                                            |
| fe.2.jul10.D       | July          | 2010        | fertilized       | DNA         | 23727                                            |
| fe.3.jul10.D       | July          | 2010        | fertilized       | DNA         | 20785                                            |
| fe.1.sep10.D       | September     | 2010        | fertilized       | DNA         | 68334                                            |
| fe.2.sep10.D       | September     | 2010        | fertilized       | DNA         | 32079                                            |
| fe.3.sep10.D       | September     | 2010        | fertilized       | DNA         | 22040                                            |
| fe.1.apr11.D       | April         | 2011        | fertilized       | DNA         | 11804                                            |
| fe.2.apr11.D       | April         | 2011        | fertilized       | DNA         | 26113                                            |
| fe.3.apr11.D       | April         | 2011        | fertilized       | DNA         | 26294                                            |
| fe.1.jul11.D       | July          | 2011        | fertilized       | DNA         | 24935                                            |
| fe.2.jul11.D       | July          | 2011        | fertilized       | DNA         | 29163                                            |
| fe.3.jul11.D       | July          | 2011        | fertilized       | DNA         | 27321                                            |
| fe.1.sep11.D       | September     | 2011        | fertilized       | DNA         | 16582                                            |
| fe.2.sep11.D       | September     | 2011        | fertilized       | DNA         | 25557                                            |
| fe.3.sep11.D       | September     | 2011        | fertilized       | DNA         | 23785                                            |
| fe.1.apr10.R       | April         | 2010        | fertilized       | RNA         | 23464                                            |
| fe.2.apr10.R       | April         | 2010        | fertilized       | RNA         | 39332                                            |
| fe.3.apr10.R       | April         | 2010        | fertilized       | RNA         | 47063                                            |
| fe.1.jul10.R       | July          | 2010        | fertilized       | RNA         | 30060                                            |
| fe.2.jul10.R       | July          | 2010        | fertilized       | RNA         | 38149                                            |
| fe.3.jul10.R       | July          | 2010        | fertilized       | RNA         | 34804                                            |
| fe.1.sep10.R       | September     | 2010        | fertilized       | RNA         | 28644                                            |
| fe.2.sep10.R       | September     | 2010        | fertilized       | RNA         | 47588                                            |
| fe.3.sep10.R       | September     | 2010        | fertilized       | RNA         | 33842                                            |
| fe.1.apr11.R       | April         | 2011        | fertilized       | RNA         | 28592                                            |
| fe.2.apr11.R       | April         | 2011        | fertilized       | RNA         | 21720                                            |
| fe.3.apr11.R       | April         | 2011        | fertilized       | RNA         | 34974                                            |
| fe.1.jul11.R       | July          | 2011        | fertilized       | RNA         | 28413                                            |
| fe.2.jul11.R       | July          | 2011        | fertilized       | RNA         | 19965                                            |
| fe.3.jul11.R       | July          | 2011        | fertilized       | RNA         | 32437                                            |
| fe.1.sep11.R       | September     | 2011        | fertilized       | RNA         | 29549                                            |
| fe.2.sep11.R       | September     | 2011        | fertilized       | RNA         | 26764                                            |
| fe.3.sep11.R       | September     | 2011        | fertilized       | RNA         | 41785                                            |

Table S2 (continued).

| <b>Sample/plot</b> | <b>Season</b> | <b>Year</b> | <b>Treatment</b> | <b>Type</b> | <b>No. of sequences <math>\geq</math> 200 bp</b> |
|--------------------|---------------|-------------|------------------|-------------|--------------------------------------------------|
| nf.1.apr10.D       | April         | 2010        | non-fertilized   | DNA         | 57027                                            |
| nf.2.apr10.D       | April         | 2010        | non-fertilized   | DNA         | 38753                                            |
| nf.3.apr10.D       | April         | 2010        | non-fertilized   | DNA         | 22641                                            |
| nf.1.jul10.D       | July          | 2010        | non-fertilized   | DNA         | 48278                                            |
| nf.2.jul10.D       | July          | 2010        | non-fertilized   | DNA         | 41926                                            |
| nf.3.jul10.D       | July          | 2010        | non-fertilized   | DNA         | 37297                                            |
| nf.1.sep10.D       | September     | 2010        | non-fertilized   | DNA         | 34497                                            |
| nf.2.sep10.D       | September     | 2010        | non-fertilized   | DNA         | 72754                                            |
| nf.3.sep10.D       | September     | 2010        | non-fertilized   | DNA         | 31675                                            |
| nf.1.apr11.D       | April         | 2011        | non-fertilized   | DNA         | 19889                                            |
| nf.2.apr11.D       | April         | 2011        | non-fertilized   | DNA         | 24163                                            |
| nf.3.apr11.D       | April         | 2011        | non-fertilized   | DNA         | 20192                                            |
| nf.1.jul11.D       | July          | 2011        | non-fertilized   | DNA         | 28212                                            |
| nf.2.jul11.D       | July          | 2011        | non-fertilized   | DNA         | 32871                                            |
| nf.3.jul11.D       | July          | 2011        | non-fertilized   | DNA         | 20910                                            |
| nf.1.sep11.D       | September     | 2011        | non-fertilized   | DNA         | 21413                                            |
| nf.2.sep11.D       | September     | 2011        | non-fertilized   | DNA         | 30533                                            |
| nf.3.sep11.D       | September     | 2011        | non-fertilized   | DNA         | 18547                                            |
| nf.1.apr10.R       | April         | 2010        | non-fertilized   | RNA         | 42641                                            |
| nf.2.apr10.R       | April         | 2010        | non-fertilized   | RNA         | 38801                                            |
| nf.3.apr10.R       | April         | 2010        | non-fertilized   | RNA         | 48222                                            |
| nf.1.jul10.R       | July          | 2010        | non-fertilized   | RNA         | 27221                                            |
| nf.2.jul10.R       | July          | 2010        | non-fertilized   | RNA         | 53503                                            |
| nf.3.jul10.R       | July          | 2010        | non-fertilized   | RNA         | 23597                                            |
| nf.1.sep10.R       | September     | 2010        | non-fertilized   | RNA         | 28239                                            |
| nf.2.sep10.R       | September     | 2010        | non-fertilized   | RNA         | 72380                                            |
| nf.3.sep10.R       | September     | 2010        | non-fertilized   | RNA         | 25334                                            |
| nf.1.apr11.R       | April         | 2011        | non-fertilized   | RNA         | 27139                                            |
| nf.2.apr11.R       | April         | 2011        | non-fertilized   | RNA         | 28004                                            |
| nf.3.apr11.R       | April         | 2011        | non-fertilized   | RNA         | 17919                                            |
| nf.1.jul11.R       | July          | 2011        | non-fertilized   | RNA         | 28802                                            |
| nf.2.jul11.R       | July          | 2011        | non-fertilized   | RNA         | 36424                                            |
| nf.3.jul11.R       | July          | 2011        | non-fertilized   | RNA         | 32771                                            |
| nf.1.sep11.R       | September     | 2011        | non-fertilized   | RNA         | 36845                                            |
| nf.2.sep11.R       | September     | 2011        | non-fertilized   | RNA         | 22847                                            |
| nf.3.sep11.R       | September     | 2011        | non-fertilized   | RNA         | 38062                                            |
