# Supplementary material for: Effects of Fertilization and Sampling Time on Composition and Diversity of Entire and Active Bacterial Communities in German Grassland Soils
Source: PubMed Central journal article supplement (PMC4687936; doi:10.1371/journal.pone.0145575), 2015-12-22
Supplement: pone.0145575.s009.pdf [file pone.0145575.s009.pdf]

**Table S4.** Chao1, Michaelis-Menten-Fit (MMF), observed OTUs, Shannon indices, Simpson indices and coverage at 20% genetic distance (phylum level) calculated for fertilized soil samples

| Sample       | Obs. OTUs | MMF    | Coverage MMF (%) | Chao1   | Coverage Chao1 (%) | Shannon index | Simpson index |
|--------------|-----------|--------|------------------|---------|--------------------|---------------|---------------|
| fe.1.apr10.D | 329.90    | 393.10 | 84               | 437.507 | 75                 | 3.43          | 0.911         |
| fe.1.apr10.R | 319.80    | 382.31 | 84               | 430.709 | 74                 | 2.94          | 0.84          |
| fe.1.apr11.D | 345.10    | 408.86 | 84               | 444.849 | 78                 | 3.39          | 0.889         |
| fe.1.apr11.R | 283.30    | 341.05 | 83               | 386.429 | 73                 | 2.76          | 0.825         |
| fe.1.jul10.D | 380.70    | 438.87 | 87               | 483.727 | 79                 | 4.04          | 0.958         |
| fe.1.jul10.R | 305.90    | 361.79 | 85               | 413.385 | 74                 | 2.85          | 0.827         |
| fe.1.jul11.D | 361.90    | 430.12 | 84               | 473.574 | 76                 | 3.36          | 0.867         |
| fe.1.jul11.R | 288.20    | 350.55 | 82               | 381.538 | 76                 | 2.65          | 0.804         |
| fe.1.sep10.D | 360.70    | 414.97 | 87               | 452.882 | 80                 | 3.91          | 0.953         |
| fe.1.sep10.R | 268.40    | 324.02 | 83               | 358.117 | 75                 | 2.72          | 0.821         |
| fe.1.sep11.D | 346.90    | 412.49 | 84               | 447.326 | 78                 | 3.25          | 0.845         |
| fe.1.sep11.R | 273.50    | 330.65 | 83               | 371.841 | 74                 | 2.56          | 0.789         |
| fe.2.apr10.D | 344.00    | 406.41 | 85               | 458.145 | 75                 | 3.49          | 0.911         |
| fe.2.apr10.R | 256.60    | 329.38 | 78               | 360.876 | 71                 | 2.03          | 0.659         |
| fe.2.apr11.D | 346.10    | 410.10 | 84               | 448.556 | 77                 | 3.28          | 0.871         |
| fe.2.apr11.R | 274.90    | 334.73 | 82               | 366.959 | 75                 | 2.48          | 0.762         |
| fe.2.jul10.D | 390.90    | 454.21 | 86               | 513.136 | 76                 | 3.93          | 0.951         |
| fe.2.jul10.R | 292.50    | 349.67 | 84               | 384.654 | 76                 | 2.68          | 0.794         |
| fe.2.jul11.D | 335.80    | 390.81 | 86               | 421.219 | 80                 | 3.45          | 0.899         |
| fe.2.jul11.R | 257.50    | 309.40 | 83               | 360.998 | 71                 | 2.51          | 0.779         |
| fe.2.sep10.D | 416.40    | 480.95 | 87               | 542.397 | 77                 | 4.20          | 0.965         |
| fe.2.sep10.R | 314.40    | 370.67 | 85               | 403.574 | 78                 | 2.97          | 0.84          |
| fe.2.sep11.D | 397.60    | 457.80 | 87               | 510.454 | 78                 | 3.99          | 0.954         |
| fe.2.sep11.R | 314.60    | 379.36 | 83               | 414.781 | 76                 | 2.82          | 0.808         |
| fe.3.apr10.D | 381.40    | 451.12 | 85               | 504.026 | 76                 | 3.41          | 0.866         |
| fe.3.apr10.R | 287.80    | 353.93 | 81               | 390.033 | 74                 | 2.48          | 0.761         |
| fe.3.apr11.D | 354.90    | 418.62 | 85               | 457.392 | 78                 | 3.37          | 0.874         |
| fe.3.apr11.R | 294.60    | 342.84 | 86               | 382.745 | 77                 | 2.93          | 0.837         |
| fe.3.jul10.D | 408.60    | 473.83 | 86               | 542.977 | 75                 | 4.09          | 0.961         |
| fe.3.jul10.R | 330.10    | 394.74 | 84               | 438.216 | 75                 | 2.99          | 0.841         |
| fe.3.jul11.D | 308.60    | 365.04 | 85               | 404.501 | 76                 | 3.05          | 0.832         |
| fe.3.jul11.R | 228.70    | 283.85 | 81               | 321.617 | 71                 | 2.16          | 0.732         |
| fe.3.sep10.D | 391.50    | 449.44 | 87               | 494.759 | 79                 | 3.99          | 0.95          |
| fe.3.sep10.R | 313.10    | 376.32 | 83               | 410.953 | 76                 | 2.94          | 0.846         |
| fe.3.sep11.D | 332.30    | 389.26 | 85               | 445.925 | 75                 | 3.35          | 0.88          |
| fe.3.sep11.R | 268.00    | 323.90 | 83               | 359.501 | 75                 | 2.53          | 0.79          |
