# Supplementary material for: Effects of Fertilization and Sampling Time on Composition and Diversity of Entire and Active Bacterial Communities in German Grassland Soils
Source: PubMed Central journal article supplement (PMC4687936; doi:10.1371/journal.pone.0145575), 2015-12-22
Supplement: pone.0145575.s010.pdf [file pone.0145575.s010.pdf]

**Table S5.** Chao1, Michaelis-Menten-Fit (MMF), observed OTUs, Shannon indices, Simpson indices and coverage at 20% genetic distance (phylum level) calculated for non-fertilized soil samples.

| Sample       | Obs. OTUs | MMF    | Coverage MMF (%) | Chao1   | Coverage Chao1 (%) | Shannon index | Simpson index |
|--------------|-----------|--------|------------------|---------|--------------------|---------------|---------------|
| nf.1.apr10.D | 360.00    | 422.16 | 85               | 477.4   | 75                 | 3.49          | 0.902         |
| nf.1.apr10.R | 305.70    | 368.37 | 83               | 415.49  | 74                 | 2.83          | 0.83          |
| nf.1.apr11.D | 368.20    | 430.12 | 86               | 482.098 | 76                 | 3.25          | 0.823         |
| nf.1.apr11.R | 305.50    | 364.59 | 84               | 406.166 | 75                 | 3.01          | 0.855         |
| nf.1.jul10.D | 331.60    | 392.58 | 84               | 437.343 | 76                 | 3.48          | 0.916         |
| nf.1.jul10.R | 289.50    | 346.89 | 83               | 395.266 | 73                 | 2.70          | 0.81          |
| nf.1.jul11.D | 355.70    | 414.37 | 86               | 458.683 | 78                 | 3.63          | 0.918         |
| nf.1.jul11.R | 263.50    | 316.36 | 83               | 363.799 | 72                 | 2.49          | 0.758         |
| nf.1.sep10.D | 348.00    | 411.87 | 84               | 474.055 | 73                 | 3.57          | 0.921         |
| nf.1.sep10.R | 315.60    | 379.17 | 83               | 414.391 | 76                 | 2.93          | 0.842         |
| nf.1.sep11.D | 381.60    | 444.95 | 86               | 486.216 | 78                 | 3.77          | 0.933         |
| nf.1.sep11.R | 320.60    | 373.80 | 86               | 438.322 | 73                 | 3.29          | 0.889         |
| nf.2.apr10.D | 375.80    | 447.55 | 84               | 488.227 | 77                 | 3.53          | 0.903         |
| nf.2.apr10.R | 295.90    | 355.86 | 83               | 389.304 | 76                 | 2.79          | 0.829         |
| nf.2.apr11.D | 341.50    | 396.03 | 86               | 442.91  | 77                 | 3.51          | 0.917         |
| nf.2.apr11.R | 292.70    | 351.37 | 83               | 421.47  | 69                 | 2.67          | 0.806         |
| nf.2.jul10.D | 339.10    | 401.16 | 85               | 464.493 | 73                 | 3.56          | 0.931         |
| nf.2.jul10.R | 275.50    | 337.29 | 82               | 367.932 | 75                 | 2.50          | 0.765         |
| nf.2.jul11.D | 342.90    | 399.02 | 86               | 438.666 | 78                 | 3.52          | 0.915         |
| nf.2.jul11.R | 299.50    | 362.24 | 83               | 405.644 | 74                 | 2.54          | 0.777         |
| nf.2.sep10.D | 340.40    | 407.87 | 83               | 439.648 | 77                 | 3.39          | 0.891         |
| nf.2.sep10.R | 320.20    | 386.88 | 83               | 429.841 | 74                 | 2.87          | 0.827         |
| nf.2.sep11.D | 341.50    | 404.73 | 84               | 448.923 | 76                 | 3.26          | 0.875         |
| nf.2.sep11.R | 268.90    | 334.93 | 80               | 368.097 | 73                 | 2.40          | 0.765         |
| nf.3.apr10.D | 384.20    | 451.95 | 85               | 492.195 | 78                 | 3.79          | 0.943         |
| nf.3.apr10.R | 277.10    | 335.78 | 83               | 365.574 | 76                 | 2.62          | 0.802         |
| nf.3.apr11.D | 361.60    | 422.34 | 86               | 468.792 | 77                 | 3.52          | 0.899         |
| nf.3.apr11.R | 302.10    | 366.67 | 82               | 408.509 | 74                 | 2.58          | 0.782         |
| nf.3.jul10.D | 346.80    | 413.84 | 84               | 467.899 | 74                 | 3.64          | 0.941         |
| nf.3.jul10.R | 324.10    | 389.60 | 83               | 419.702 | 77                 | 2.99          | 0.85          |
| nf.3.jul11.D | 332.50    | 391.18 | 85               | 454.457 | 73                 | 3.29          | 0.874         |
| nf.3.jul11.R | 271.80    | 335.95 | 81               | 379.09  | 72                 | 2.41          | 0.756         |
| nf.3.sep10.D | 340.80    | 406.60 | 84               | 455.856 | 75                 | 3.66          | 0.945         |
| nf.3.sep10.R | 329.10    | 395.05 | 83               | 430.621 | 76                 | 2.88          | 0.804         |
| nf.3.sep11.D | 352.20    | 414.40 | 85               | 447.24  | 79                 | 3.50          | 0.904         |
| nf.3.sep11.R | 283.90    | 339.19 | 84               | 383.635 | 74                 | 2.67          | 0.809         |
