# Supplementary material for: Effects of Fertilization and Sampling Time on Composition and Diversity of Entire and Active Bacterial Communities in German Grassland Soils
Source: PubMed Central journal article supplement (PMC4687936; doi:10.1371/journal.pone.0145575), 2015-12-22
Supplement: pone.0145575.s011.pdf [file pone.0145575.s011.pdf]

**Table S6.** Chao1, Michaelis-Menten-Fit (MMF), observed OTUs, Shannon indices, Simpson indices and coverage at 3% genetic distance (species level) calculated for fertilized soil samples

| Sample       | Obs. OTUs | MMF      | Coverage MMF (%) | Chao1    | Coverage Chao1 (%) | Shannon index | Simpson index |
|--------------|-----------|----------|------------------|----------|--------------------|---------------|---------------|
| fe.1.apr10.D | 3,533.50  | 7,443.72 | 47               | 8,352.01 | 42                 | 6.83          | 0.99          |
| fe.1.apr10.R | 3,362.60  | 8,377.43 | 40               | 9,350.91 | 36                 | 6.16          | 0.98          |
| fe.1.apr11.D | 3,661.00  | 8,273.90 | 44               | 9,543.51 | 38                 | 6.75          | 0.99          |
| fe.1.apr11.R | 2,485.30  | 5,171.73 | 48               | 6,180.17 | 40                 | 5.60          | 0.96          |
| fe.1.jul10.D | 3,549.90  | 7,135.18 | 50               | 8,192.97 | 43                 | 7.01          | 0.99          |
| fe.1.jul10.R | 3,502.20  | 8,610.54 | 41               | 9,708.60 | 36                 | 6.06          | 0.96          |
| fe.1.jul11.D | 3,397.00  | 7,386.63 | 46               | 8,243.70 | 41                 | 6.60          | 0.99          |
| fe.1.jul11.R | 2,215.90  | 4,924.85 | 45               | 5,882.24 | 38                 | 5.05          | 0.94          |
| fe.1.sep10.D | 3,730.40  | 8,137.87 | 46               | 9,269.85 | 40                 | 6.93          | 0.99          |
| fe.1.sep10.R | 3,348.20  | 8,030.63 | 42               | 9,260.66 | 36                 | 6.16          | 0.97          |
| fe.1.sep11.D | 4,017.70  | 8,818.65 | 46               | 9,885.08 | 41                 | 7.19          | 1.00          |
| fe.1.sep11.R | 2,485.50  | 5,220.93 | 48               | 6,490.45 | 38                 | 5.65          | 0.96          |
| fe.2.apr10.D | 2,433.40  | 5,075.13 | 48               | 6,357.31 | 38                 | 5.67          | 0.97          |
| fe.2.apr10.R | 2,216.40  | 5,056.07 | 44               | 6,021.05 | 37                 | 4.69          | 0.88          |
| fe.2.apr11.D | 3,024.10  | 7,005.35 | 43               | 8,325.98 | 36                 | 5.97          | 0.97          |
| fe.2.apr11.R | 2,350.60  | 5,361.83 | 44               | 6,195.84 | 38                 | 5.13          | 0.94          |
| fe.2.jul10.D | 3,314.70  | 6,785.17 | 49               | 8,416.30 | 39                 | 6.87          | 1.00          |
| fe.2.jul10.R | 2,856.80  | 6,488.34 | 44               | 7,889.27 | 36                 | 5.83          | 0.97          |
| fe.2.jul11.D | 2,932.20  | 6,764.50 | 43               | 7,989.55 | 37                 | 5.78          | 0.95          |
| fe.2.jul11.R | 2,301.20  | 5,243.51 | 44               | 6,093.79 | 38                 | 4.88          | 0.91          |
| fe.2.sep10.D | 3,300.90  | 7,005.74 | 47               | 8,543.74 | 39                 | 6.71          | 0.99          |
| fe.2.sep10.R | 2,887.00  | 6,745.33 | 43               | 7,970.75 | 36                 | 5.77          | 0.97          |
| fe.2.sep11.D | 3,025.10  | 6,804.79 | 44               | 7,999.27 | 38                 | 6.06          | 0.97          |
| fe.2.sep11.R | 2,280.10  | 5,177.16 | 44               | 6,214.42 | 37                 | 4.91          | 0.92          |
| fe.3.apr10.D | 2,410.80  | 4,875.85 | 49               | 6,174.85 | 39                 | 5.73          | 0.97          |
| fe.3.apr10.R | 2,407.90  | 5,357.96 | 45               | 6,448.21 | 37                 | 5.20          | 0.94          |
| fe.3.apr11.D | 3,327.00  | 8,053.37 | 41               | 9,271.08 | 36                 | 5.93          | 0.94          |
| fe.3.apr11.R | 2,471.30  | 5,688.88 | 43               | 6,828.62 | 36                 | 5.37          | 0.96          |
| fe.3.jul10.D | 3,161.90  | 6,534.74 | 48               | 8,005.74 | 39                 | 6.57          | 0.99          |
| fe.3.jul10.R | 2,435.10  | 5,778.43 | 42               | 6,872.45 | 35                 | 5.11          | 0.94          |
| fe.3.jul11.D | 3,249.70  | 7,683.24 | 42               | 8,773.27 | 37                 | 5.96          | 0.95          |
| fe.3.jul11.R | 2,301.70  | 5,289.29 | 44               | 6,249.79 | 37                 | 5.07          | 0.94          |
| fe.3.sep10.D | 3,439.70  | 7,595.30 | 45               | 8,608.86 | 40                 | 6.71          | 0.99          |
| fe.3.sep10.R | 2,644.50  | 6,357.24 | 42               | 7,579.46 | 35                 | 5.43          | 0.96          |
| fe.3.sep11.D | 3,254.90  | 7,617.83 | 43               | 8,901.00 | 37                 | 6.01          | 0.95          |
| fe.3.sep11.R | 2,376.60  | 5,520.48 | 43               | 6,495.67 | 37                 | 5.21          | 0.95          |

Table S3 continued: Chao1, michaelis-menten-fit (MMF), observed OTUs, Shannon-, Simpson-indices, and the coverage of chao1 and MMF in % at 3% genetic distance calculated for non-fertilized soil samples

| <b>Sample</b> | <b>Obs.<br/>OTUs</b> | <b>MMF</b> | <b>coverage<br/>MMF %</b> | <b>Chao1</b> | <b>coverage<br/>Chao1 %</b> | <b>Shannon<br/>corr.</b> | <b>Simpson</b> |
|---------------|----------------------|------------|---------------------------|--------------|-----------------------------|--------------------------|----------------|
| nf.1.apr10.D  | 2,880.50             | 6,374.64   | 45                        | 7,631.01     | 38                          | 5.98                     | 0.97           |
| nf.1.apr10.R  | 2,435.70             | 5,128.78   | 47                        | 6,267.89     | 39                          | 5.54                     | 0.96           |
| nf.1.apr11.D  | 3,600.00             | 8,344.67   | 43                        | 9,629.26     | 37                          | 6.59                     | 0.98           |
| nf.1.apr11.R  | 2,419.70             | 5,353.16   | 45                        | 6,388.14     | 38                          | 5.42                     | 0.96           |
| nf.1.jul10.D  | 2,938.80             | 6,409.38   | 46                        | 7,744.69     | 38                          | 6.08                     | 0.98           |
| nf.1.jul10.R  | 3,259.20             | 7,750.36   | 42                        | 8,626.49     | 38                          | 6.18                     | 0.98           |
| nf.1.jul11.D  | 3,376.30             | 7,529.48   | 45                        | 8,930.88     | 38                          | 6.51                     | 0.98           |
| nf.1.jul11.R  | 2,394.10             | 5,908.84   | 41                        | 6,950.88     | 34                          | 4.90                     | 0.92           |
| nf.1.sep10.D  | 3,032.90             | 6,858.83   | 44                        | 8,108.52     | 37                          | 5.93                     | 0.96           |
| nf.1.sep10.R  | 3,112.20             | 7,287.10   | 43                        | 8,723.44     | 36                          | 6.03                     | 0.97           |
| nf.1.sep11.D  | 3,239.90             | 7,151.90   | 45                        | 8,733.32     | 37                          | 6.39                     | 0.98           |
| nf.1.sep11.R  | 2,401.40             | 5,400.19   | 44                        | 6,368.17     | 38                          | 5.28                     | 0.95           |
| nf.2.apr10.D  | 2,950.20             | 6,044.58   | 49                        | 7,178.80     | 41                          | 6.43                     | 0.99           |
| nf.2.apr10.R  | 2,731.70             | 5,895.18   | 46                        | 7,040.79     | 39                          | 5.90                     | 0.97           |
| nf.2.apr11.D  | 3,402.70             | 8,023.85   | 42                        | 9,263.07     | 37                          | 6.33                     | 0.97           |
| nf.2.apr11.R  | 2,643.30             | 6,209.03   | 43                        | 7,535.76     | 35                          | 5.46                     | 0.96           |
| nf.2.jul10.D  | 2,521.40             | 4,686.95   | 54                        | 5,794.76     | 44                          | 6.33                     | 0.99           |
| nf.2.jul10.R  | 2,413.70             | 5,337.76   | 45                        | 6,506.61     | 37                          | 5.38                     | 0.96           |
| nf.2.jul11.D  | 3,006.40             | 6,854.37   | 44                        | 8,309.71     | 36                          | 6.10                     | 0.97           |
| nf.2.jul11.R  | 2,256.50             | 5,149.60   | 44                        | 6,264.86     | 36                          | 5.10                     | 0.95           |
| nf.2.sep10.D  | 2,636.20             | 4,989.75   | 53                        | 6,535.58     | 40                          | 6.24                     | 0.98           |
| nf.2.sep10.R  | 3,167.20             | 7,413.04   | 43                        | 8,623.58     | 37                          | 6.08                     | 0.97           |
| nf.2.sep11.D  | 3,078.60             | 6,902.05   | 45                        | 8,050.91     | 38                          | 6.11                     | 0.97           |
| nf.2.sep11.R  | 2,325.70             | 5,727.57   | 41                        | 6,665.32     | 35                          | 4.83                     | 0.92           |
| nf.3.apr10.D  | 3,891.40             | 8,703.98   | 45                        | 0,062.35     | 39                          | 7.01                     | 0.99           |
| nf.3.apr10.R  | 2,952.20             | 6,921.75   | 43                        | 8,134.66     | 36                          | 5.84                     | 0.97           |
| nf.3.apr11.D  | 3,023.90             | 7,490.27   | 40                        | 8,839.03     | 34                          | 5.69                     | 0.95           |
| nf.3.apr11.R  | 2,823.80             | 6,707.73   | 42                        | 7,384.02     | 38                          | 5.59                     | 0.96           |
| nf.3.jul10.D  | 2,506.20             | 4,947.26   | 51                        | 6,186.17     | 41                          | 5.92                     | 0.98           |
| nf.3.jul10.R  | 3,306.70             | 8,004.72   | 41                        | 8,706.97     | 38                          | 6.08                     | 0.97           |
| nf.3.jul11.D  | 3,272.80             | 7,811.78   | 42                        | 8,807.20     | 37                          | 6.22                     | 0.98           |
| nf.3.jul11.R  | 2,817.20             | 6,887.81   | 41                        | 7,675.72     | 37                          | 5.50                     | 0.95           |
| nf.3.sep10.D  | 2,630.50             | 5,442.65   | 48                        | 6,742.54     | 39                          | 6.07                     | 0.99           |
| nf.3.sep10.R  | 3,162.80             | 7,590.92   | 42                        | 8,698.21     | 36                          | 5.91                     | 0.96           |
| nf.3.sep11.D  | 2,956.30             | 6,610.75   | 45                        | 7,512.26     | 39                          | 6.03                     | 0.98           |
| nf.3.sep11.R  | 2,722.00             | 5,999.56   | 45                        | 6,976.53     | 39                          | 5.72                     | 0.97           |
