# Supplementary material for: Effects of Fertilization and Sampling Time on Composition and Diversity of Entire and Active Bacterial Communities in German Grassland Soils
Source: PubMed Central journal article supplement (PMC4687936; doi:10.1371/journal.pone.0145575), 2015-12-22
Supplement: pone.0145575.s012.pdf [file pone.0145575.s012.pdf]

**Table S7.** Chao1, Michaelis-Menten-Fit (MMF), observed OTUs, Shannon indices, Simpson indices and coverage at 3% genetic distance (species level) calculated for non-fertilized soil samples

| Sample       | Obs. OTUs | MMF      | Coverage MMF (%) | Chao1    | Coverage Chao1 (%) | Shannon index | Simpson index |
|--------------|-----------|----------|------------------|----------|--------------------|---------------|---------------|
| nf.1.apr10.D | 2,880.50  | 6,374.64 | 45               | 7,631.01 | 38                 | 5.98          | 0.97          |
| nf.1.apr10.R | 2,435.70  | 5,128.78 | 47               | 6,267.89 | 39                 | 5.54          | 0.96          |
| nf.1.apr11.D | 3,600.00  | 8,344.67 | 43               | 9,629.26 | 37                 | 6.59          | 0.98          |
| nf.1.apr11.R | 2,419.70  | 5,353.16 | 45               | 6,388.14 | 38                 | 5.42          | 0.96          |
| nf.1.jul10.D | 2,938.80  | 6,409.38 | 46               | 7,744.69 | 38                 | 6.08          | 0.98          |
| nf.1.jul10.R | 3,259.20  | 7,750.36 | 42               | 8,626.49 | 38                 | 6.18          | 0.98          |
| nf.1.jul11.D | 3,376.30  | 7,529.48 | 45               | 8,930.88 | 38                 | 6.51          | 0.98          |
| nf.1.jul11.R | 2,394.10  | 5,908.84 | 41               | 6,950.88 | 34                 | 4.90          | 0.92          |
| nf.1.sep10.D | 3,032.90  | 6,858.83 | 44               | 8,108.52 | 37                 | 5.93          | 0.96          |
| nf.1.sep10.R | 3,112.20  | 7,287.10 | 43               | 8,723.44 | 36                 | 6.03          | 0.97          |
| nf.1.sep11.D | 3,239.90  | 7,151.90 | 45               | 8,733.32 | 37                 | 6.39          | 0.98          |
| nf.1.sep11.R | 2,401.40  | 5,400.19 | 44               | 6,368.17 | 38                 | 5.28          | 0.95          |
| nf.2.apr10.D | 2,950.20  | 6,044.58 | 49               | 7,178.80 | 41                 | 6.43          | 0.99          |
| nf.2.apr10.R | 2,731.70  | 5,895.18 | 46               | 7,040.79 | 39                 | 5.90          | 0.97          |
| nf.2.apr11.D | 3,402.70  | 8,023.85 | 42               | 9,263.07 | 37                 | 6.33          | 0.97          |
| nf.2.apr11.R | 2,643.30  | 6,209.03 | 43               | 7,535.76 | 35                 | 5.46          | 0.96          |
| nf.2.jul10.D | 2,521.40  | 4,686.95 | 54               | 5,794.76 | 44                 | 6.33          | 0.99          |
| nf.2.jul10.R | 2,413.70  | 5,337.76 | 45               | 6,506.61 | 37                 | 5.38          | 0.96          |
| nf.2.jul11.D | 3,006.40  | 6,854.37 | 44               | 8,309.71 | 36                 | 6.10          | 0.97          |
| nf.2.jul11.R | 2,256.50  | 5,149.60 | 44               | 6,264.86 | 36                 | 5.10          | 0.95          |
| nf.2.sep10.D | 2,636.20  | 4,989.75 | 53               | 6,535.58 | 40                 | 6.24          | 0.98          |
| nf.2.sep10.R | 3,167.20  | 7,413.04 | 43               | 8,623.58 | 37                 | 6.08          | 0.97          |
| nf.2.sep11.D | 3,078.60  | 6,902.05 | 45               | 8,050.91 | 38                 | 6.11          | 0.97          |
| nf.2.sep11.R | 2,325.70  | 5,727.57 | 41               | 6,665.32 | 35                 | 4.83          | 0.92          |
| nf.3.apr10.D | 3,891.40  | 8,703.98 | 45               | 0,062.35 | 39                 | 7.01          | 0.99          |
| nf.3.apr10.R | 2,952.20  | 6,921.75 | 43               | 8,134.66 | 36                 | 5.84          | 0.97          |
| nf.3.apr11.D | 3,023.90  | 7,490.27 | 40               | 8,839.03 | 34                 | 5.69          | 0.95          |
| nf.3.apr11.R | 2,823.80  | 6,707.73 | 42               | 7,384.02 | 38                 | 5.59          | 0.96          |
| nf.3.jul10.D | 2,506.20  | 4,947.26 | 51               | 6,186.17 | 41                 | 5.92          | 0.98          |
| nf.3.jul10.R | 3,306.70  | 8,004.72 | 41               | 8,706.97 | 38                 | 6.08          | 0.97          |
| nf.3.jul11.D | 3,272.80  | 7,811.78 | 42               | 8,807.20 | 37                 | 6.22          | 0.98          |
| nf.3.jul11.R | 2,817.20  | 6,887.81 | 41               | 7,675.72 | 37                 | 5.50          | 0.95          |
| nf.3.sep10.D | 2,630.50  | 5,442.65 | 48               | 6,742.54 | 39                 | 6.07          | 0.99          |
| nf.3.sep10.R | 3,162.80  | 7,590.92 | 42               | 8,698.21 | 36                 | 5.91          | 0.96          |
| nf.3.sep11.D | 2,956.30  | 6,610.75 | 45               | 7,512.26 | 39                 | 6.03          | 0.98          |
| nf.3.sep11.R | 2,722.00  | 5,999.56 | 45               | 6,976.53 | 39                 | 5.72          | 0.97          |
